# Supplementary material for: Al-assisted high frequency self-powered oscillations of liquid metal droplets
Source: Royal Society of Chemistry journal article supplement (doi:10.1039/c9sm01899a), 2019-01-01
Supplement: c9sm01899a3.pdf [file c9sm01899a3.pdf]

**Supplementary material:**

## **AI-Assisted High Frequency Self- Powered Oscillations of Liquid Metal Droplets**

Sen Chen,<sup>1,4,5</sup> Xiaohu Yang,<sup>2</sup> Hongzhang Wang,<sup>3</sup> Ronghang Wang,<sup>1,4,5</sup> and  
Jing Liu,<sup>1,3,4,5</sup> a)

<sup>1</sup> Beijing Key Lab of Cryo-Biomedical Engineering, Technical Institute of Physics  
and Chemistry, Chinese Academy of Sciences, Beijing 100190, China

<sup>2</sup> Science and Technology on Thermal Energy and Power Laboratory, Wuhan Second  
Ship Design and Research Institute, Wuhan 430205, China

<sup>3</sup> School of Future Technology, University of Chinese Academy of Sciences, Beijing  
100049, China

<sup>4</sup> Department of Biomedical Engineering, School of Medicine, Tsinghua University,  
Beijing 100084, China

<sup>5</sup> Chinese Academy of Sciences Key Laboratory of Cryogenics, Technical Institute of  
Physics and Chemistry, Beijing 100190, China

a) Corresponding author. Electronic mail: [jliu@mail.ipc.ac.cn](mailto:jliu@mail.ipc.ac.cn).

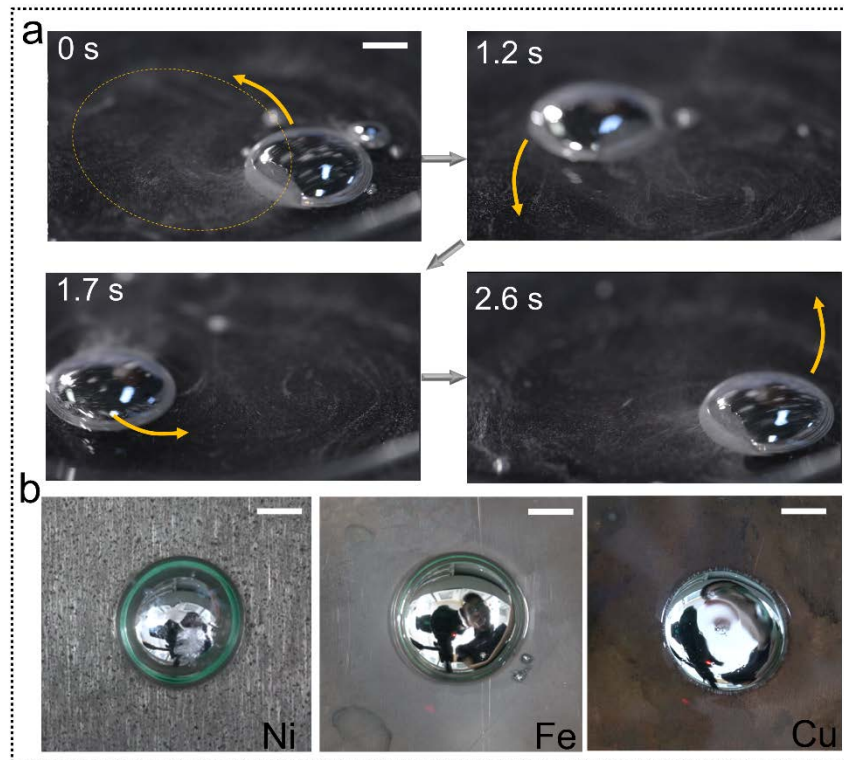

**Figure S1.** (a) On the glass plate, self-driven motion of liquid metal droplets that have swallowed Al foil occurs. (b) Pure liquid metal droplets can spread spontaneously on the Fe, Ni and Cu plates. Scale bars, 10mm. Here, the amount of liquid metal and Al foil is 2mL and 60mg, respectively.

Table S1. Standard electrode potentials of several metals involved in the study under alkaline conditions. <sup>1</sup>

| Reaction                                                                                                | E°/V   |
|---------------------------------------------------------------------------------------------------------|--------|
| $\text{H}_2\text{GaO}_3^- + \text{H}_2\text{O} + 3\text{e} \rightleftharpoons \text{Ga} + 4\text{OH}^-$ | -1.219 |
| $\text{In}(\text{OH})_3 + 3\text{e} \rightleftharpoons \text{In} + 3\text{OH}^-$                        | -0.99  |
| $[\text{Al}(\text{OH})_4]^- + 3\text{e} \rightleftharpoons \text{Al} + 4\text{OH}^-$                    | -2.328 |
| $\text{Ni}(\text{OH})_2 + 2\text{e} \rightleftharpoons \text{Ni} + 2\text{OH}^-$                        | -0.72  |
| $\text{Cu}(\text{OH})_2 + 2\text{e} \rightleftharpoons \text{Cu} + 2\text{OH}^-$                        | -0.222 |
| $\text{Mg}(\text{OH})_2 + 2\text{e} \rightleftharpoons \text{Mg} + 2\text{OH}^-$                        | -2.690 |

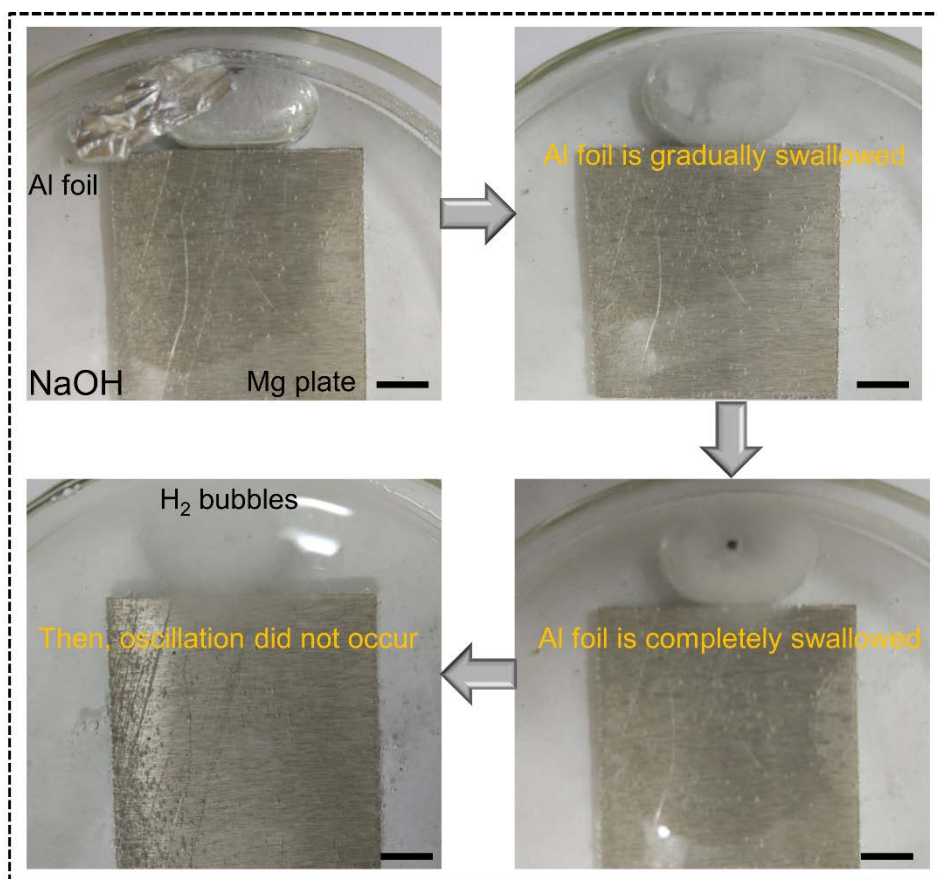

**Figure S2.** The liquid metal droplet placed on the Mg plate no longer spontaneously oscillates. Scale bars, 10mm. Here, the amount of liquid metal and Al foil is 2mL and 60mg, respectively.

**Movie S1.**

A movie shows the high frequency oscillation of liquid metal droplets on Fe plates.

**Movie S2.**

A movie shows the directional self-driven motion of liquid metal droplets on glass plates.

**References**

1. D. R. Lide, *CRC handbook of chemistry and physics*, CRC press, 2004.
